# Supplementary material for: Stage-Related Neurotoxicity of BPA in the Development of Zebrafish Embryos
Source: MDPI journal article supplement (doi:10.3390/toxics11020177), 2023-02-14
Supplement: s1 [file s1]

## Supporting Information

**Table S1.** Primer sequences for target genes.

| Gene Name                       | Primer Sequence (5'-3')    |
|---------------------------------|----------------------------|
| <i><math>\beta</math>-actin</i> | F: ACGAACGACCAACCTAAACTCT  |
|                                 | R: TTAGACAACCTACCTCCCTTTGC |
| <i>cypin</i>                    | F: TGATGCCTCACTTCTGCTCG    |
|                                 | R: CCATGCAAACCTTTCCCCACT   |
